# Supplementary material for: Highly selective production of propionic acid from lactic acid catalyzed by NaI
Source: Royal Society of Chemistry journal article supplement (doi:10.1039/d0gc02676j), 2020-01-01
Supplement: d0gc02676j1.pdf [file d0gc02676j1.pdf]

### The processing details of the reactions in Table 3

Reactions were conducted in 50 mL or 250 mL stainless steel pressure vessels (from kemi company) equipped with a glass liner. All the materials needed for the reaction are weighed and added to the glass liner. After the reaction, all the remaining substances in the reaction vessel and the pressure gauge channel are washed out using ultrapure water and collected. Then the reaction solution volume was adjusted with ultrapure water to 250 mL, and analyzed by UPLC.

The way to calculate the conversion and yield is as follows:

$$w_{LA} = \left( 1 - \frac{C_{LA} \times V}{M_{LA} \times n_{LA}} \right) \times 100\%$$
$$w_{PA} = \frac{C_{PA} \times V - m_{PA}}{M_{PA} \times n_{LA}} \times 100\%$$

$w_{LA}$ : conversion of LA

$C_{LA}$  or  $C_{PA}$ : LA or PA concentration after reaction (g/L)

$V$ : solvent volume (L)

$n_{LA}$ : initial mole mass of LA (mol)

$w_{PA}$ : yield of PA

$m_{PA}$ : initial PA feed (g)

$M_{LA}$  or  $M_{PA}$ : LA or PA molecular mass (g/mol)

### The process for purifying PA from I- solution

After the reaction in Table 3 entry 10, the total propionic acid was determined to be 8.9 g (8.0 g solvent + 0.9 g product). An equal volume of cyclohexane (8 mL) was used to extract PA. After standing still, most PA was extracted into cyclohexane, and the aqueous phase with remaining PA was separated for the next cycle. Cyclohexane in the organic phase was evaporated at 45°C for 20 min, and the residue was dissolved with ultrapure water (final solution). The final solution was analyzed by UPLC (Fig. S3). It was found that 8.2 g propionic acid was extracted (the extraction rate reached 92%). And no NaI was detected. Therefore, PA can be separated through this simple method.

### Two-step process description for the preparation of PA from cellulose

The conversion of cellulose to lactic acid was referred to Dong's work<sup>1</sup>. After the reaction, the reaction solution was directly evaporated to dryness at 45°C. Subsequently, 10 mL of acetic acid was added to dissolve the lactic acid (solution A). After measuring the concentration of lactic acid, 8 mL solution A and 1eq. NaI were put into the reactor for the second step using the condition as shown in Scheme 7 (the second step). After the reaction, UPLC was used to determine the final yield of propionic acid.

**Table S1** The concentration of metal ions in the reaction solution

| Elem   | Conc.(ppm) |
|--------|------------|
| Ir2242 | 0.02792    |
| Al1670 | 0.5851     |
| As1890 | -0.03936   |
| B_2497 | 0.3411     |
| Ba4554 | 0.5621     |
| Be3130 | -0.001093  |
| Bi2230 | 0.1450     |
| Cd2288 | 0.1384     |
| Co2286 | 0.07062    |
| Cr2835 | 0.07184    |
| Cu3247 | 0.02564    |
| Fe2599 | 0.8339     |
| Ga2943 | -0.09403   |
| Li6707 | 0.02166    |
| Mg2795 | 0.6136     |
| Mn2576 | 0.08055    |
| Ni2216 | 0.9558     |
| Pb2203 | 0.05893    |
| Pd3404 | 0.009119   |
| Pt2144 | -0.01072   |
| Rh3434 | -0.05374   |
| Ru2678 | 0.09911    |
| Sb2068 | 0.03085    |
| Sn1899 | 3.212      |
| Sr4077 | 0.04939    |
| Ti3349 | 0.2804     |
| Tl1908 | -0.3288    |
| V_3093 | 0.1525     |
| Zn2138 | 0.1731     |

**Table S2** Conversion of LA by adding SnCl<sub>2</sub>

| Catalyst          | Conversion (%) | Yield of AOPA (%) | Yield of PA (%) |
|-------------------|----------------|-------------------|-----------------|
| SnCl <sub>2</sub> | 92.4           | 31.3              | 57.4            |

Reaction condition: LA 2 mmol, 400 psi H<sub>2</sub>, 500 rpm, 1 h, 2 mmol NaI, 0.01 g SnCl<sub>2</sub>(2.3% eq), 8 ml HAc.

**Table S3** PA recovery experiment

| Entry | PA recovery /% |
|-------|----------------|
| 1     | 99.0           |
| 2     | 100.1          |
| 3     | 99.5           |

Reaction condition: 8 g Propionic acid, 2 mmol NaI, 220°C, 1 h, 400 psi H<sub>2</sub>, 500 rpm.

**Table S4** Conversion of LA with HAc as solvent

| Conversion (%) | Yield of AOPA (%) | Yield of PA (%) |
|----------------|-------------------|-----------------|
| 100.0          | 0.0               | 93.3            |

Reaction condition: LA 1.25 g, 1 mmol NaI, 0.3 g H<sub>2</sub>O, 400 psi H<sub>2</sub>, 8 mL HAc, 220°C, 10 h, 500 rpm.

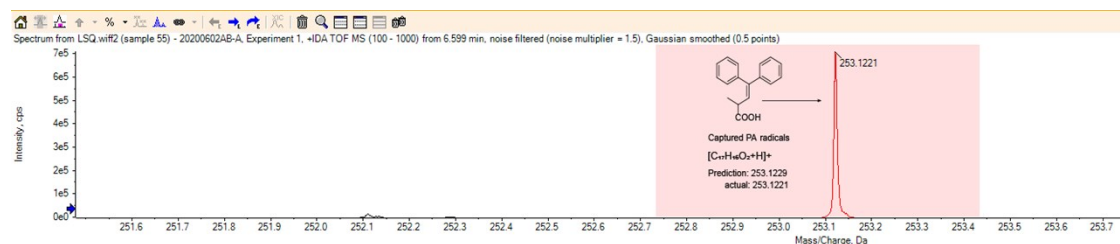

**Fig. S1** MS-QTOF spectrum of the compound formed during the radical capture (Figure S1).

Note: The peak (253.1221) is speculated to be the protonated  $C_{17}H_{16}O_2$  ( $[C_{17}H_{16}O_2+H]^+$ ), implying that the adduct of  $C_3H_6O_2$  and  $C_{14}H_{12}$  was generated during the reaction.

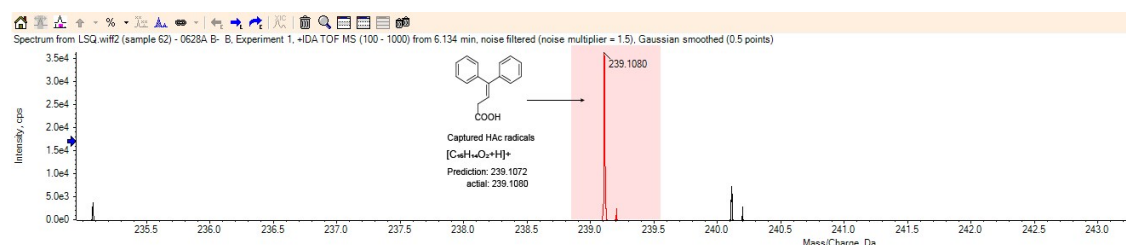

**Fig. S2** MS-QTOF spectrum of the compound formed during the radical capture (Figure S2).

Note: The peak (239.1080) is speculated to be the protonated  $C_{16}H_{14}O_2$  ( $[C_{16}H_{14}O_2+H]^+$ ), implying that the adduct of  $C_2H_4O_2$  and  $C_{14}H_{12}$  was generated during the reaction.

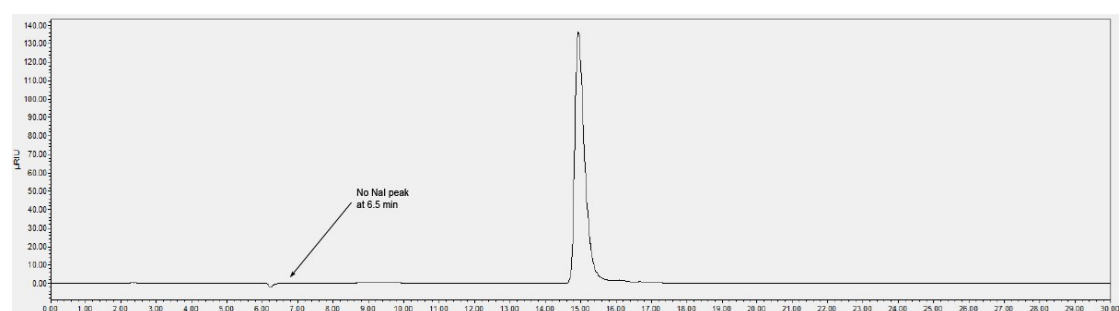

**Fig. S3** UPLC spectrum of the aqueous reaction liquid.

Reference:

1. X. Lei, F.-F. Wang, C.-L. Liu, R.-Z. Yang and W.-S. Dong, *Applied Catalysis A: General*, 2014, **482**, 78-83.
